# Supplementary material for: Research to Move Toward Evidence-Based Recommendations for Lead Service Line Disclosure Policies in Home Buying and Home Renting Scenarios
Source: MDPI journal article supplement (doi:10.3390/ijerph16060963), 2019-03-18
Supplement: s1 [file s1]

## Writing Task

---

Imagine that you have been looking to **rent** a new home and have just found the right place—it is within your price range and fits all your needs. Please write 2-3 sentences to describe what your perfect home may look like.

## No Test Results Condition

---

Imagine that you have already applied to **rent** the perfect home you just identified and the landlord has accepted your application.

In the paperwork you receive before signing the lease, you notice that the landlord has disclosed that there is a lead service line on this property.

## Below EPA Level Condition

---

Imagine that you have already applied to **rent** the perfect home you just identified and the landlord has accepted your application.

In the paperwork you receive before signing the lease, you notice that the landlord has disclosed that there is a lead service line on this property. However, the landlord has also attached water test results that say “Levels are 5 parts per billion (ppb), which is lower than EPA’s Lead Action Level of 15 ppb for drinking water.”

## Above EPA Level Condition

---

Imagine that you have already applied to **rent** the perfect home you just identified and the landlord has accepted your application.

In the paperwork you receive before signing the lease, you notice that the landlord has disclosed that there is a lead service line on this property. The landlord has also attached water test results that say “Levels are 20 parts per billion (ppb), which is higher than EPA’s Lead Action Level of 15 ppb for drinking water.”

---

## Link Seen by All Participants

---

As part of the rental, the landlord is required to provide you with a 20-page pamphlet, “Protect Your Family from Lead in Your Home”, which can also be accessed at this web page:

[http://www.epa.gov/sites/production/files/2017-](http://www.epa.gov/sites/production/files/2017-06/documents/pyf_color_landscape_format_2017_508.pdf)

[06/documents/pyf\\_color\\_landscape\\_format\\_2017\\_508.pdf](http://www.epa.gov/sites/production/files/2017-06/documents/pyf_color_landscape_format_2017_508.pdf). On page 13, you can find information on lead in drinking water. You may look at this information if you choose, or proceed to the next page of the survey.

Powered by Qualtrics

## Intro

---

Thinking about this **home renting** scenario and the information you have been provided, please answer the questions on the following pages.

---

## Questions Block 1

---

Please rate your likelihood of doing the following regarding the lead service line in the rental home.

---

I would insist that the landlord replace the lead pipes as a condition of renting.

Extremely  
unlikely  
☐

Moderately  
unlikely  
☐

Slightly unlikely  
☐

Slightly likely  
☐

Moderately  
likely  
☐

Extremely likely  
☐

---

I would pay (\$1,000-\$5,000) to replace the lead pipes after moving in.

Extremely  
unlikely  
☐

Moderately  
unlikely  
☐

Slightly unlikely  
☐

Slightly likely  
☐

Moderately  
likely  
☐

Extremely likely  
☐

---

I would move in, and install and maintain a filter designed to remove a lead even though I must replace the filter monthly at a cost of about \$150 a year.

Extremely  
unlikely  
☐

Moderately  
unlikely  
☐

Slightly unlikely  
☐

Slightly likely  
☐

Moderately  
likely  
☐

Extremely likely  
☐

---

I would move in and leave the lead pipes alone.

Extremely  
unlikely  
☐

Moderately  
unlikely  
☐

Slightly unlikely  
☐

Slightly likely  
☐

Moderately  
likely  
☐

Extremely likely  
☐

---

I would look for another home to rent.

Extremely  
unlikely

☐

Moderately  
unlikely

☐

Slightly unlikely

☐

Slightly likely

☐

Moderately  
likely

☐

Extremely likely

☐

---

## Questions Block 2

---

How likely would you be to do each of the following?

---

I would look for additional information about lead service lines.

Extremely  
unlikely

☐

Moderately  
unlikely

☐

Slightly unlikely

☐

Slightly likely

☐

Moderately  
likely

☐

Extremely likely

☐

I would share information about lead service lines with others.

Extremely  
unlikely

☐

Moderately  
unlikely

☐

Slightly unlikely

☐

Slightly likely

☐

Moderately  
likely

☐

Extremely likely

☐

I would avoid looking at information about lead service lines.

Extremely  
unlikely

☐

Moderately  
unlikely

☐

Slightly unlikely

☐

Slightly likely

☐

Moderately  
likely

☐

Extremely likely

☐

I would contact the water department to urge them to take action to replace lead service lines.

Extremely  
unlikely

☐

Moderately  
unlikely

☐

Slightly unlikely

☐

Slightly likely

☐

Moderately  
likely

☐

Extremely likely

☐

I would participate in a town hall meeting in support of action to replace lead service lines.

|                       |                        |                       |                       |                       |                       |
|-----------------------|------------------------|-----------------------|-----------------------|-----------------------|-----------------------|
| Extremely<br>unlikely | Moderately<br>unlikely | Slightly unlikely     | Slightly likely       | Moderately<br>likely  | Extremely likely      |
| <input type="radio"/> | <input type="radio"/>  | <input type="radio"/> | <input type="radio"/> | <input type="radio"/> | <input type="radio"/> |

---

I would sign a petition in support of taking action to replace lead service lines.

|                       |                        |                       |                       |                       |                       |
|-----------------------|------------------------|-----------------------|-----------------------|-----------------------|-----------------------|
| Extremely<br>unlikely | Moderately<br>unlikely | Slightly unlikely     | Slightly likely       | Moderately<br>likely  | Extremely likely      |
| <input type="radio"/> | <input type="radio"/>  | <input type="radio"/> | <input type="radio"/> | <input type="radio"/> | <input type="radio"/> |

---

I would join or volunteer with an organization working to replace lead service lines.

|                       |                        |                       |                       |                       |                       |
|-----------------------|------------------------|-----------------------|-----------------------|-----------------------|-----------------------|
| Extremely<br>unlikely | Moderately<br>unlikely | Slightly unlikely     | Slightly likely       | Moderately<br>likely  | Extremely likely      |
| <input type="radio"/> | <input type="radio"/>  | <input type="radio"/> | <input type="radio"/> | <input type="radio"/> | <input type="radio"/> |

---

I would host a neighborhood meeting in your home to discuss actions people can take to replace lead service lines.

|                       |                        |                       |                       |                       |                       |
|-----------------------|------------------------|-----------------------|-----------------------|-----------------------|-----------------------|
| Extremely<br>unlikely | Moderately<br>unlikely | Slightly unlikely     | Slightly likely       | Moderately<br>likely  | Extremely likely      |
| <input type="radio"/> | <input type="radio"/>  | <input type="radio"/> | <input type="radio"/> | <input type="radio"/> | <input type="radio"/> |

---

### Questions Block 3

---

To what extent did you feel each of the following emotions when you were reading the home-renting scenario?

|              | None at all           | Very slightly         | A little              | A moderate amount     | A great deal          | Extremely             |
|--------------|-----------------------|-----------------------|-----------------------|-----------------------|-----------------------|-----------------------|
| Annoyed      | <input type="radio"/> |
| Disgusted    | <input type="radio"/> |
| Enthusiastic | <input type="radio"/> |

|            | None at all           | Very slightly         | A little              | A moderate amount     | A great deal          | Extremely             |
|------------|-----------------------|-----------------------|-----------------------|-----------------------|-----------------------|-----------------------|
| Angry      | <input type="radio"/> |
| Optimistic | <input type="radio"/> |
| Sad        | <input type="radio"/> |
| Scared     | <input type="radio"/> |
| Afraid     | <input type="radio"/> |
| Hopeful    | <input type="radio"/> |

---

To what extent do you agree or disagree with the following statements?

|                                                                                                             | Strongly disagree     | Disagree              | Somewhat disagree     | Somewhat agree        | Agree                 | Strongly agree        |
|-------------------------------------------------------------------------------------------------------------|-----------------------|-----------------------|-----------------------|-----------------------|-----------------------|-----------------------|
| Lead service lines in my home would expose me to lead in my drinking water.                                 | <input type="radio"/> |
| Lead can result in heart disease, even at low levels.                                                       | <input type="radio"/> |
| People in my home could be at risk for exposure to a high level of lead if my home had a lead service line. | <input type="radio"/> |
| Lead exposure can harm children and lower their quality of life.                                            | <input type="radio"/> |
| Exposure to lead has serious negative consequences.                                                         | <input type="radio"/> |

---

To what extent do you agree or disagree with the following statements?

| Strongly disagree | Disagree | Somewhat disagree | Somewhat agree | Agree | Strongly agree |
|-------------------|----------|-------------------|----------------|-------|----------------|
|-------------------|----------|-------------------|----------------|-------|----------------|

|                                                                                                                                     | Strongly disagree     | Disagree              | Somewhat disagree     | Somewhat agree        | Agree                 | Strongly agree        |
|-------------------------------------------------------------------------------------------------------------------------------------|-----------------------|-----------------------|-----------------------|-----------------------|-----------------------|-----------------------|
| I could afford to spend \$1,000-\$5,000 replacing the lead pipes with lead-free ones in the rental home.                            | <input type="radio"/> |
| I do not think it would be possible for me to replace the lead pipes in the rental home with lead-free ones.                        | <input type="radio"/> |
| One way to significantly reduce exposure to lead in drinking water would be to replace the lead service line with a lead-free line. | <input type="radio"/> |
| Having lead pipes replaced with lead-free ones would significantly reduce exposure to lead for people in the rental home.           | <input type="radio"/> |

|                                                                                                                      | Strongly disagree     | Disagree              | Somewhat disagree     | Somewhat agree        | Agree                 | Strongly agree        |
|----------------------------------------------------------------------------------------------------------------------|-----------------------|-----------------------|-----------------------|-----------------------|-----------------------|-----------------------|
| I would be willing to spend \$1,000-\$5,000 to replace the lead pipes with lead-free ones in the rental home.        | <input type="radio"/> |
| I would be able to have lead pipes replaced with lead-free ones in the rental home.                                  | <input type="radio"/> |
| I think it would be worth spending \$1,000-\$5,000 to replace the lead pipes with lead-free ones in the rental home. | <input type="radio"/> |

Please estimate your knowledge of **lead service lines** on a 0-100 scale, where 0 means knowing nothing and 100 means knowing everything you could possibly know about the topic. How much do you think you currently know?

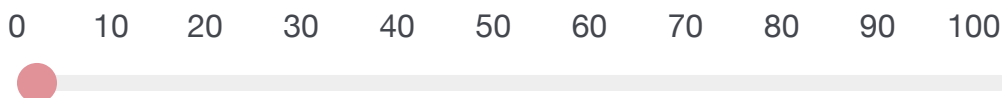

Think of that same scale again. This time, please estimate how much knowledge you would need to achieve an understanding of **lead service lines** that is good enough for your purposes. Of course, you might feel you need the same, more, or possibly even less, information about this topic. Using a scale of 0-100, how much information would be sufficient for you, that is, good enough for your purposes?

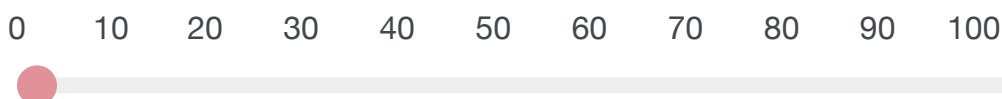

How likely would you be to go to the following sources to learn more about lead service lines?

|                                                          | Extremely unlikely    | Moderately unlikely   | Slightly unlikely     | Slightly likely       | Moderately likely     | Extremely likely      |
|----------------------------------------------------------|-----------------------|-----------------------|-----------------------|-----------------------|-----------------------|-----------------------|
| Traditional media (e.g., TV, radio, newspaper, magazine) | <input type="radio"/> |
| The water utility company                                | <input type="radio"/> |
| The Internet                                             | <input type="radio"/> |
| Friends and family                                       | <input type="radio"/> |
| My local, state or federal government                    | <input type="radio"/> |

What would you like to learn more about regarding lead service lines?

- ☐ The cost of replacing a lead service line
- ☐ The health effects of lead exposure



☐ How having a lead service line affects the value of a home

☐ How the replacement works

☐ Other (Please specify)

☐ I do not want to learn more about lead service lines.

---

Do you own the home where you live?

☐ No, my housemate owns my home.

☐ No, I rent my home.

☐ Yes, I own or co-own my home.

☐  Other

---

Do you know if your home (owned or rented) has a lead service line?

☐ No, I do not know.

☐ No, but I used to have one and it was removed.

☐ Yes, I know that I do not have one.

☐ Yes, I know that I have one.

---

When you signed the contract to buy your home, or the lease to rent your home, do you remember seeing a clause about whether or not lead plumbing or lead pipes were present?

☐ No.

☐ Yes.

☐ I don't know.

---

If you discovered that your rental home had a lead service line on the private side, would you ask your landlord to replace it?

☐ No.

☐ Yes.

☐ I don't know.

---

Do you think your landlord would comply with this request?

- ☐ No.
- ☐ Yes.
- ☐ I don't know.
- 

How many years have passed since you bought the home where you live?

---

If you were to rent a new home within the next 5 years, what price range would you be looking for?  
(per month)

- ☐ \$500 or less
- ☐ \$501 - \$1,000
- ☐ \$1,001 - \$1,500
- ☐ \$1,501 - \$2,000
- ☐ \$2,001 - \$2,500
- ☐ \$2,501 - \$3,000
- ☐ \$3,001 or more
- 

How do you describe yourself?

- ☐ Male
- ☐ Female
- ☐ Transgender man
- ☐ Transgender woman
- ☐ Do not identify as male, female, or transgender
-

In what year were you born?

What is your current residential zip code?

Are you now married, widowed, divorced, separated, never married, or living with a partner?

- ☐ Married
- ☐ Widowed
- ☐ Divorced
- ☐ Separated
- ☐ Never married
- ☐ Living with a partner

What is the highest level of school you have completed?

- ☐ Grade 8 or lower
- ☐ Some high school, no diploma
- ☐ High school diploma, or equivalent
- ☐ Some college, no degree
- ☐ Associate degree
- ☐ Bachelor's degree
- ☐ Master's degree
- ☐ Professional degree (MD, JD)
- ☐ Doctorate degree

Last year, before taxes, what would you say was your household income?

- ☐ \$24,999 or less
- ☐ \$25,000 to \$34,999

- ☐ \$35,000 to \$49,999
  - ☐ \$50,000 to \$74,999
  - ☐ \$75,000 to \$99,999
  - ☐ \$100,000 to \$149,999
  - ☐ \$150,000 to \$199,999
  - ☐ \$200,000 or more
- 

Are you Hispanic, Latino/a/x, or of Spanish origin?

- ☐ No, not of Hispanic, Latino/a/x, or Spanish origin
  - ☐ Yes, Mexican American, Chicano
  - ☐ Yes, Puerto Rican
  - ☐ Yes, Cuban
  - ☐ Yes, another Hispanic, Latino/a/x, or Spanish origin
- 

What race or races do you consider yourself to be? Please select 1 or more of these categories.

- |                                                           |                                                 |
|-----------------------------------------------------------|-------------------------------------------------|
| <input type="checkbox"/> Black or African American        | <input type="checkbox"/> Vietnamese             |
| <input type="checkbox"/> White                            | <input type="checkbox"/> Native Hawaiian        |
| <input type="checkbox"/> American Indian or Alaska Native | <input type="checkbox"/> Guamanian or Chamorro  |
| <input type="checkbox"/> Asian Indian                     | <input type="checkbox"/> Samoan                 |
| <input type="checkbox"/> Chinese                          | <input type="checkbox"/> Other Asian            |
| <input type="checkbox"/> Filipino                         | <input type="checkbox"/> Other Pacific Islander |
| <input type="checkbox"/> Japanese                         | <input type="checkbox"/> Other                  |
| <input type="checkbox"/> Korean                           |                                                 |
- 

Generally speaking, do you think of yourself as a...?

- ☐ Republican
- ☐ Democrat
- ☐ Independent
- ☐ Another party

☐ No preference

---

If you had to choose, do you think of yourself as closer to the...?

☐ Republican party

☐ Democratic party

---

In general, do you think of yourself as...?

☐ Extremely liberal

☐ Liberal

☐ Slightly liberal

☐ Moderate, middle of the road

☐ Slightly conservative

☐ Conservative

☐ Extremely conservative

---

Do you have children?

☐ No

☐ Yes

---

Do you plan to have children/more children than you currently have?

☐ No

☐ Yes

☐ Don't know

---

Do you live with kids under 12 years of age, such as your own children or grandchildren, nephews, or siblings?

- ☐ No
- ☐ Yes
- 

Do you have pets?

- ☐ No
- ☐ Yes
- 

Have you or anyone in your family suffered from the consequences of lead poisoning?

- ☐ No
- ☐ Yes
- ☐ Don't know
- 

Had you heard about lead service lines before this survey?

- ☐ No, I had never heard about lead service lines.
- ☐ Kind of, I had heard about lead in plumbing, but not about lead service lines.
- ☐ Yes, I had heard about lead service lines.

Powered by Qualtrics
